# Supplementary material
Source: publisher figshare collection journal article supplement (https://sage.figshare.com/ndownloader/files/22055847)
Supplement: Supplementary file 1 [file 22055847]

**Table S2.** Characteristics of this study population for patients diagnosed osteoporosis or used bisphosphon

|                   | Osteoporosis diagnosis | Bisphosphonate use |
|-------------------|------------------------|--------------------|
| Claims, n         | 1,203,077              | 340,337            |
| Users, n          | 94,404                 | 23,605             |
| Incident users, n | 59,330                 | 13,412             |
| Male, n (%)       | 11,544 (19.5)          | 2,695 (20.1)       |
| Age, years, n (%) |                        |                    |
| <20               | 1,338 (2.3)            | 169 (1.3)          |
| 20-39             | 4,533 (7.6)            | 1,088 (8.1)        |
| 40-59             | 30,866 (52.0)          | 5,024 (37.5)       |
| 60-75             | 22,593 (38.1)          | 7,131 (53.2)       |
| Median [range]    | 56 [0-75]              | 60 [2-75]          |

Incident users: number of patients who were first diagnosed osteoporosis or used bisphosphonate
